# Supplementary material
Source: PubMed Central journal article supplement (PMC7496028)
Supplement: ao0c03143_si_001.pdf [file ao0c03143_si_001.pdf]

**Title: Ropivacaine prevents activation of NLRP3 inflammasome caused by high glucose in HUVECs**

**Authors:** Xin Huang\*, Jingyan Jiang, Lijun Huang, Qiusheng Ren, Xiang Gao, Shenghui Yu

**Affiliations:**

Department of Anesthesiology, The Affiliated People's Hospital of Ningbo University

**\*, Corresponding to:**

Xin Huang

Department of Anesthesiology, The Affiliated People's Hospital of Ningbo University, 315040, China

Address : No. 251, Baizhang East Road, Yinzhou, Ningbo, 315040, China

Tel/Fax: +86-0574-87016852

E-mail: Huangxin1784@163.com

**Figure S1**

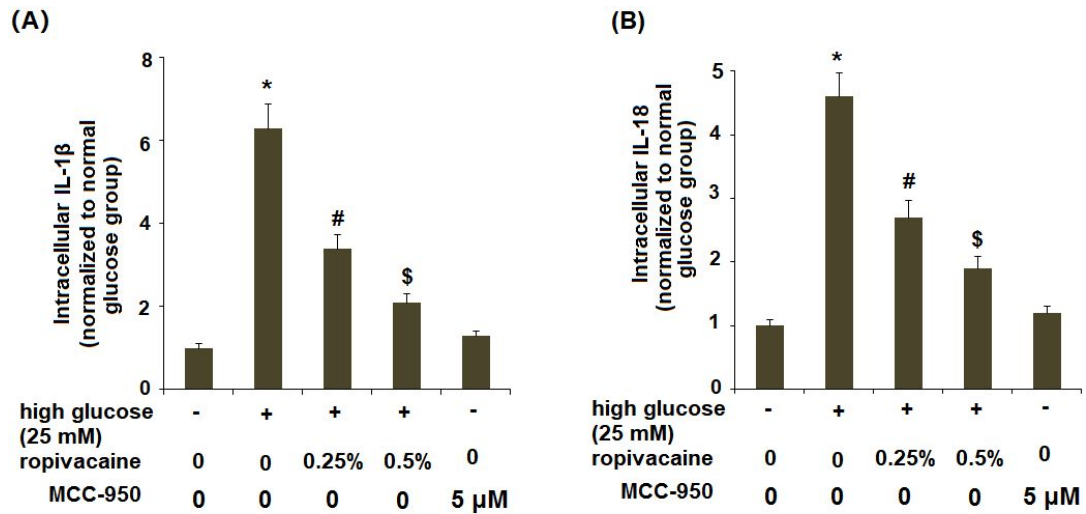

**Figure S1.** Ropivacaine inhibits high glucose-induced expression of intracellular IL-1 $\beta$  and IL-18. HUVECs were treated with high glucose (25 mM) in the presence or absence of ropivacaine (0.25%, 0.5%) MCC-950 (5  $\mu$ M) for 24 h. (A). Intracellular IL-1 $\beta$  was measured by ELISA analysis; (B). Intracellular IL-18 was measured by ELISA assay (\*, P<0.01 vs normal glucose; #, P<0.01 high glucose only; \$, P<0.01 vs. high glucose+ropivacaine (0.25%), N=5-6).

**Figure S2**

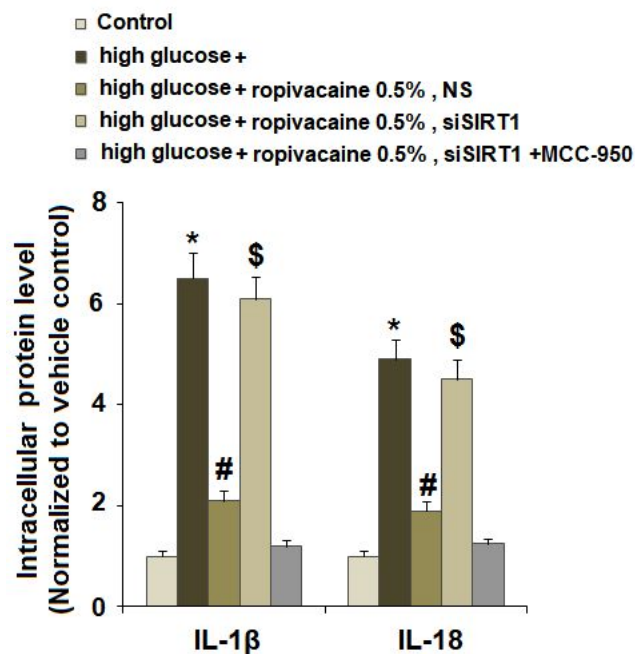

**Figure S2.** Silencing of SIRT1 abolished the inhibitory effects of ropivacaine on intracellular IL-1 $\beta$  and IL-18 production. HUVECs were transfected with SIRT1 siRNA. At 12 h post transfection, cells were treated with high glucose (25 mM) in the presence or absence of ropivacaine (0.5%) for 24 h. NS, non-specific group; siSIRT1, SIRT1 siRNA. Intracellular IL-1 $\beta$  and IL-18 were measured by ELISA assay (\*,  $P < 0.01$  vs normal glucose; #,  $P < 0.01$  high glucose only; \$,  $P < 0.01$  vs. high glucose+ropivacaine (0.5%)+NS group, N=5-6).
